# Supplementary material for: Role of SaPCR2 in Zn Uptake in the Root Elongation Zone of the Zn/Cd Hyperaccumulator Sedum alfredii
Source: MDPI journal article supplement (doi:10.3390/life12050768), 2022-05-23
Supplement: s1 [file s1]

**Table S1.** Primers for real-time PCR analysis and vector construction of *SaPCR2*.

| Primer ID                 | Primer sequence (5' to 3')               | Function            | Reference |
|---------------------------|------------------------------------------|---------------------|-----------|
| <i>SaACTIN1</i> -qF1      | TGTGCTTTCCCTCTATGCC                      | Real-time PCR       | [1]       |
| <i>SaACTIN1</i> -qR1      | CTGCTCCATACAAGCCAACCACG                  |                     |           |
| <i>SaPCR2</i> -qF1        | GCGGTGGGATGTGGTCTAC                      | Real-time PCR       | [2]       |
| <i>SaPCR2</i> -qR1        | CGATAATCTCGGCTATTTGGC                    |                     |           |
| pDR196- <i>SaPCR2</i> -F1 | tataccccagcctcgactagtATGTATCCATCTTTGTCTG | Vector construction | [2]       |
| pDR196- <i>SaPCR2</i> -R1 | gataagcttgatatcgaattcTCATCTACTCATCCCCTGC |                     |           |

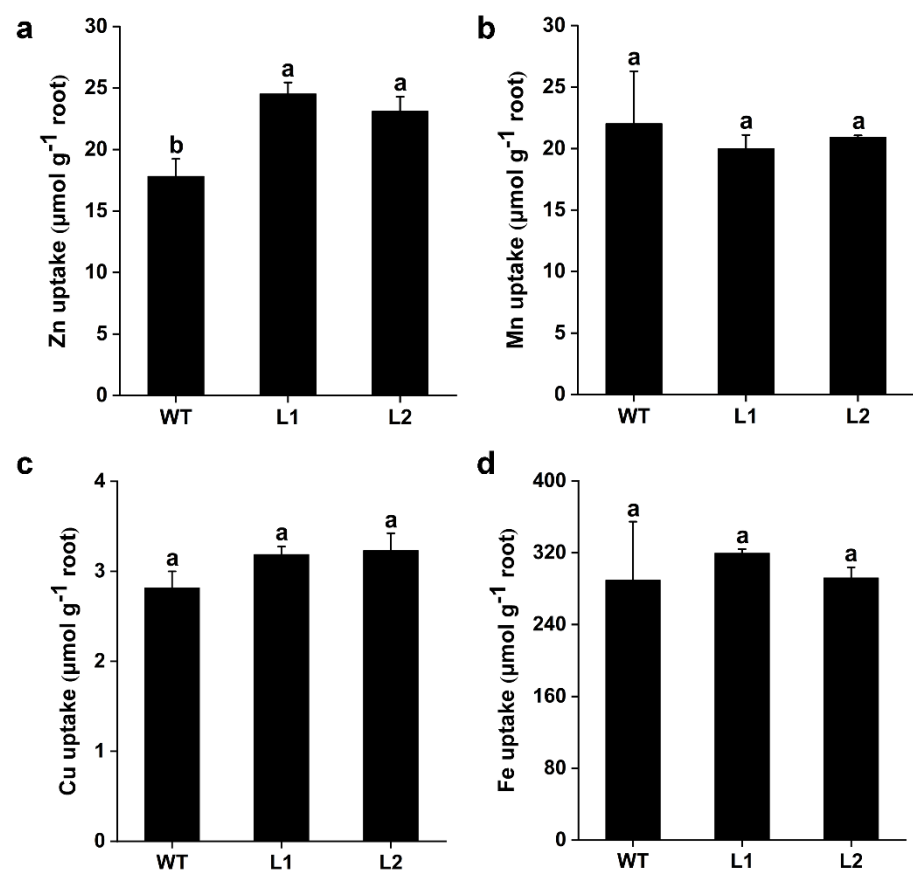

**Figure S1.** Trace elements uptake, including (a) Zn, (b) Mn, (c) Cu, and (d) Fe, in the non-hyperaccumulating ecotype (NHE) *Sedum alfredii* wild type (WT) and *SaPCR2* overexpressing lines (L1 and L2) after five-week-preculturing. Uptake was calculated in terms of the root dry weight. Different letters indicate significant differences between genotype in a treatment ( $P < 0.05$ ). Error bars = mean  $\pm$  standard error (SE;  $n = 3$ ).

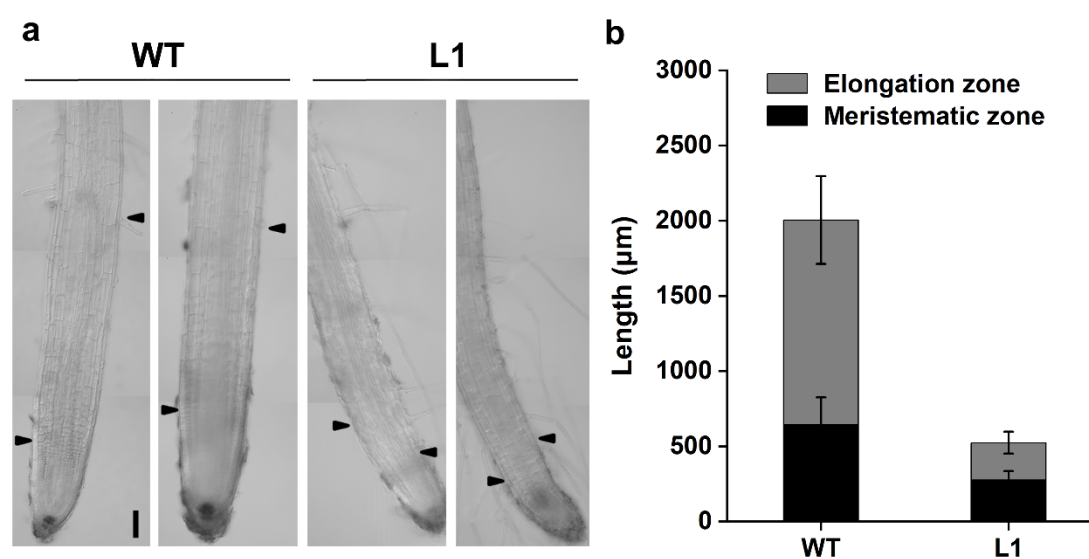

**Figure S2.** Root tip structures of the non-hyperaccumulating ecotype (NHE) *Sedum alfredii* wild type (WT) and *SaPCR2* overexpressing lines (L1 and L2) grown in normal nutrient solution. (a) Growth of root tips. Bar=200 μm. (b) Length of meristematic zone and elongation zone. Error bars = mean ± SE (n=5).

|                |                                                                                                     |     |
|----------------|-----------------------------------------------------------------------------------------------------|-----|
| SaPCR2-protein | .....MYP <b>S</b> LENEHDQK <b>Y</b> TPSR <b>G</b> .....                                             | 20  |
| AtZIP1         | .MSECGCFSAITMLRICVVL <b>I</b> ICLHMCCASDCTSHDDPV <b>S</b> QDEAEK..ATK <b>L</b> KLGS <b>I</b> AL     | 57  |
| AtZIP2         | MALSSKTLKSTLFFLSIIFLCFSLILAHGGIDDGDEEETNQPPATGTTTVVNLRSKSL                                          | 60  |
| NcZNT1         | .....MASSPTK <b>I</b> LCDAGESDLCRDDAA...AFL <b>L</b> KFVA <b>I</b> AS                               | 34  |
| Consensus      |                                                                                                     |     |
| SaPCR2-protein | LQRGIPAPVELY.....PPY <b>I</b> PPQ....LRPR <b>L</b> TGG <b>M</b> W <b>S</b> TGL <b>C</b> HCCDDPANSFI | 68  |
| AtZIP1         | LLVAGGVGVSLP....LIGKRIPALQ <b>P</b> ENDIFFMVKAFAAGVILCTGFV <b>H</b> LPDAFERLS                       | 113 |
| AtZIP2         | VLVKIYCIILFFSTFLAGVSPYFYRWNESFLLGTQFSGIFLATALIHFLSDANETFR                                           | 120 |
| NcZNT1         | ILLAGAAGVAIP....LIGKNRRFLQTEGNLFVAAKAFAGVILATGFV <b>H</b> LAGGTEALT                                 | 90  |
| Consensus      |                                                                                                     |     |
| SaPCR2-protein | TCC <b>C</b> PCITF.....GQIA <b>E</b> IIDKGSPNCATHGAIYGLILMTG.....CAC                                | 108 |
| AtZIP1         | SPC <b>L</b> EDTTAGK <b>F</b> PFAGFVAMLSAMGTLMDTFATGYKRQHFSN.....NHG <b>S</b> K                     | 162 |
| AtZIP2         | GLKHKEYPY.AFMLAAAGCYCLTMLADVAVAFVAAGSNNNHVGAS.....VGESRE                                            | 169 |
| NcZNT1         | NPCLPDYPWSKEFPFGFFAMVAALITLLVDFMGTOY <b>Y</b> ESKQQRNEVAGGGEAAVVE <b>T</b> SS                       | 150 |
| Consensus      |                                                                                                     |     |
| SaPCR2-protein | LYSCFYRS.....KMRAQYDLQ.....E <b>S</b> PCVD <b>C</b> L                                               | 133 |
| AtZIP1         | QNVVV <b>V</b> DE.....EEH <b>A</b> G.....HVHI <b>H</b> THAS.....HG <b>H</b> THG <b>S</b> TEL        | 194 |
| AtZIP2         | DDDVAVKE.....EG.....RREIKSGVD.....V <b>S</b> QALIR <b>T</b>                                         | 196 |
| NcZNT1         | VLPVVVERGND <b>S</b> KAFGEEDGGGMHIVGIRAAAHNHSHSNAHGTFDGHAGQ <b>S</b> HGHV <b>H</b>                  | 210 |
| Consensus      |                                                                                                     |     |
| SaPCR2-protein | V.....HFCCKTCALCQEYRELKSRGLDMGIGWEANIERQRRGTVTSPVVPQ <b>G</b> MS                                    | 183 |
| AtZIP1         | I.....RRRIVSQVLEIGIVVHSV <b>I</b> IGISLGASQSIDIKPLMAALS <b>F</b> HQFFEG <b>L</b> G                  | 245 |
| AtZIP2         | S.....GFGDTALLIFALCFHSIFEGIAIGLSDTKSDAWRNLT <b>I</b> SLHKVFAAVA                                     | 246 |
| NcZNT1         | HGSHDVENGARHVVSQILELGIVSHS <b>I</b> IIGLSLGV <b>S</b> QSPCTIRPLIAALS <b>F</b> HQFFEG <b>F</b> A     | 270 |
| Consensus      |                                                                                                     |     |
| SaPCR2-protein | R.....                                                                                              | 184 |
| AtZIP1         | LGG <b>C</b> ISLADMK <b>S</b> KSTVLMATFFSVTAP <b>L</b> GIGIGLGMSSGLGYRKESKEAIMVEGMLNAAS             | 305 |
| AtZIP2         | MG..IALLKLIPKRPFFLTVVYSFAFGISS <b>P</b> IGVGIGIGINATSQAGAGDWTYAISM <b>L</b> A                       | 304 |
| NcZNT1         | LGG <b>C</b> ISQAQFKNKSAIIMACFFALTAP <b>I</b> GIGIGITAVAS..SFNSHSPGALVTEGILDSLS                     | 328 |
| Consensus      |                                                                                                     |     |
| SaPCR2-protein | .....                                                                                               | 184 |
| AtZIP1         | AGIL <b>I</b> YMSLV <b>D</b> LLATDFMNPRLQSNLWHLAAAYLSLVLAGAGSM <b>S</b> LLAIW                       | 354 |
| AtZIP2         | CGVFVYVAVNH <b>L</b> ISKGYK.PREECYFDKPIYKFI <b>A</b> VF <b>L</b> GVALLSV <b>V</b> MIW               | 352 |
| NcZNT1         | AGIL <b>T</b> YMALVDLIAADFLSKRMSCNVRLQVVS <b>Y</b> VML <b>F</b> LGA <b>L</b> MSALAIW                | 377 |
| Consensus      |                                                                                                     |     |

**Figure S3.** Alignment of protein sequences of SaPCR2, AtZIP1, AtZIP2, and NcZNT1. Red box indicated a highly conserved sequence region.

## References

1. Chao, Y.; Zhang, M.; Feng, Y.; Yang, X.; Islam, E. cDNA-AFLP analysis of inducible gene expression in zinc hyperaccumulator *Sedum alfredii* Hance under zinc induction. *Environ. Exp. Bot.* **2010**, *68*, 107–112, <https://doi:10.1016/j.envexpbot.2009.11.013>.
2. Lin, J.; Gao, X.; Zhao, J.; Zhang, J.; Chen, S.; Lu, L. Plant Cadmium Resistance 2 (SaPCR2) facilitates cadmium efflux in the roots of hyperaccumulator *Sedum alfredii* Hance. *Front. Plant Sci.* **2020**, *11*, 568887, <https://doi:10.3389/fpls.2020.568887>.
